# Supplementary material for: Synthesis, spectral and redox properties of tetraammine dioxolene ruthenium complexes †
Source: Royal Society of Chemistry journal article supplement (doi:10.1039/b005488g), 2000-01-01
Supplement: pourbaix.doc [file pourbaix.doc]

**Pourbaix Diagram for the dependence of redox process potentials on pH for the species [Ru(NH3)4(cat-CO2]**

**
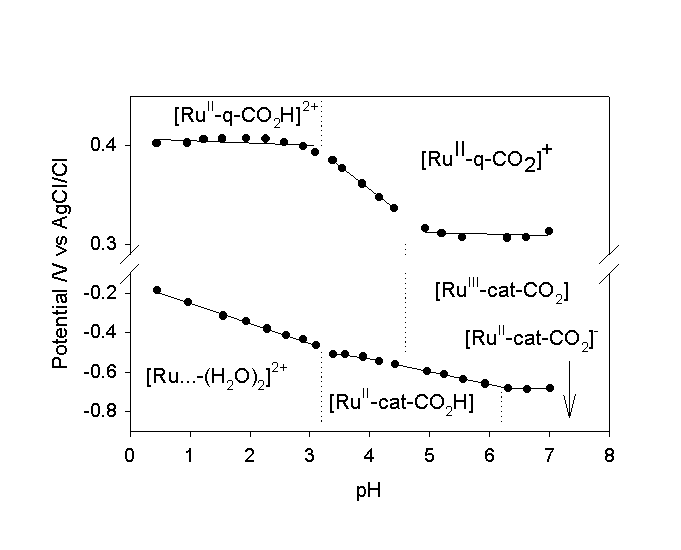
**
