# Supplementary figures and images for: Synthesis, spectral and redox properties of tetraammine dioxolene ruthenium complexes †
Source: Royal Society of Chemistry journal article supplement (doi:10.1039/b005488g), 2000-01-01

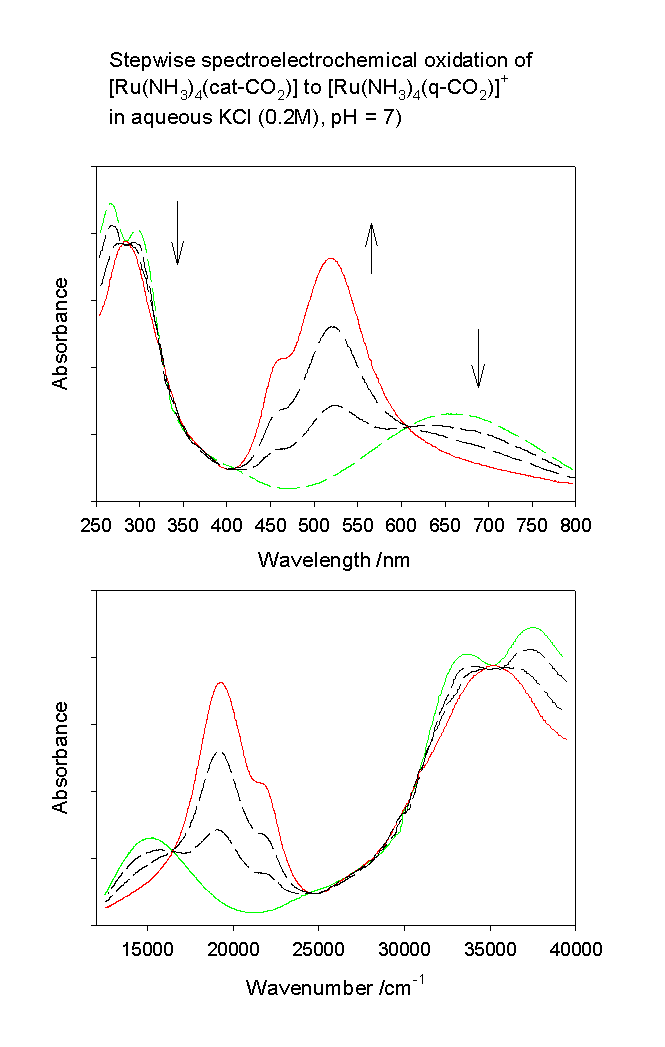

Supplement: specco2.doc [file specco2.doc]
